# Supplementary material
Source: ML conference proceedings conference paper supplement (https://openreview.net/forum?id=VH6WIPF4Sj)
Supplement: supplementary_material [file attachment]

## 399 Appendices

### 400 A Implementation Details

#### 401 A.1 Real Robot Experiment

402 **Perception:** Our perception pipeline uses two OAK-D Pro cameras to estimate the 6D (x, y, z, roll, pitch, yaw) pose of objects. The side camera, oriented towards the shelf, determines the poses of the objects on the shelf. In contrast, the top camera determines the pose of the object situated on the table. We maintain a database encompassing comprehensive details of all objects in the experiment, including their size and texture. We approximate all objects as cuboids, defined by three parameters: length, width, and height. Side and top view images of these objects are captured to form a collection of ground truth images. These images aid the identification of objects via the SIFT (Scale Invariant Feature Transform) feature matching algorithm. This algorithm is executed for each object in the scene to match keypoints, which are subsequently used to calculate the homography matrix. We then use this matrix to calculate the 2D coordinates and 1D orientation for each object in the image space. Given the setup of our experiment, it suffices to estimate 3 degrees of freedom (DOF) for all objects: (y, z, roll) for objects on the shelf and (x, y, yaw) for the object on the table. The other 3 DOF is deterministic based on the known shelf location and object size. Incorporating the 3D pose of each object in the image space with our prior knowledge of the experiment setup, we can obtain 415 the 6D pose for all the objects in the scene for robot manipulation.

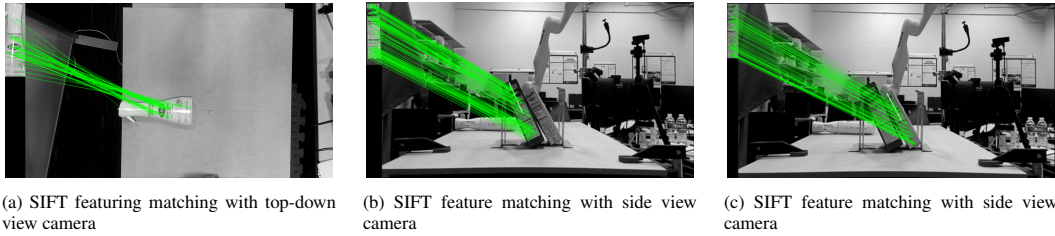

Figure 6: SIFT results with setup-(f). The ground truth images collected before the experiment are shown in the upper-left corner of each subfigure. The green lines show the keypoints correspondence.

#### 417 A.2 More information on the objects

Table 4: Object Dimensions

| Object      | Length (m) | Width (m) | Height (m) | Image                                                                                 |
|-------------|------------|-----------|------------|---------------------------------------------------------------------------------------|
| Sugar box   | 0.089      | 0.040     | 0.177      |  |
| Lint roller | 0.110      | 0.050     | 0.230      |  |

Continued on next page

Table 4 – Continued from previous page

| Object        | Length<br>(m) | Width<br>(m) | Height<br>(m) | Image                                                                                 |
|---------------|---------------|--------------|---------------|---------------------------------------------------------------------------------------|
| Clorox bottle | 0.065         | 0.255        | 0.055         |    |
| Cheez-it box  | 0.152         | 0.047        | 0.190         |    |
| Charger box   | 0.168         | 0.051        | 0.240         |    |
| Book          | 0.203         | 0.028        | 0.245         |    |
| Amazon box    | 0.210         | 0.288        | 0.045         |   |
| Keto box      | 0.193         | 0.259        | 0.046         |  |
| Kellogg's box | 0.190         | 0.045        | 0.284         |  |
| Chex box      | 0.195         | 0.050        | 0.285         |  |
| Cheerios box  | 0.195         | 0.052        | 0.285         |  |

Continued on next page

Table 4 – *Continued from previous page*

| Object          | Length<br>(m) | Width<br>(m) | Height<br>(m) | Image                                                                               |
|-----------------|---------------|--------------|---------------|-------------------------------------------------------------------------------------|
| Bran flakes box | 0.198         | 0.297        | 0.057         |  |
| Power drill box | 0.250         | 0.073        | 0.279         |  |
